# Supplementary material for: Advances in Predictions of Oral Bioavailability of Candidate Drugs in Man with New Machine Learning Methodology
Source: MDPI journal article supplement (doi:10.3390/molecules26092572), 2021-04-28
Supplement: s1 [file s1]

# Supplement

## Advances in Predictions of Oral Bioavailability of Candidate Drugs in Man with New Machine Learning Methodology

Urban Fagerholm <sup>1,\*</sup>, Sven Hellberg <sup>1</sup> and Ola Spjuth <sup>1,2</sup>

<sup>1</sup> Prosilico AB, Lännavägen 7, SE-141 45 Huddinge, Sweden; urban.fagerholm@prosilico.com (U.F.); sven.hellberg@prosilico.com (S.H.); ola.spjuth@farmbio.uu.se (O.S.)

<sup>2</sup> Department of Pharmaceutical Biosciences and Science for Life Laboratory, Uppsala University, Box 591, SE-751 24 Uppsala, Sweden

\* Correspondence: urban.fagerholm@prosilico.com; Tel.: +46-70-1731302

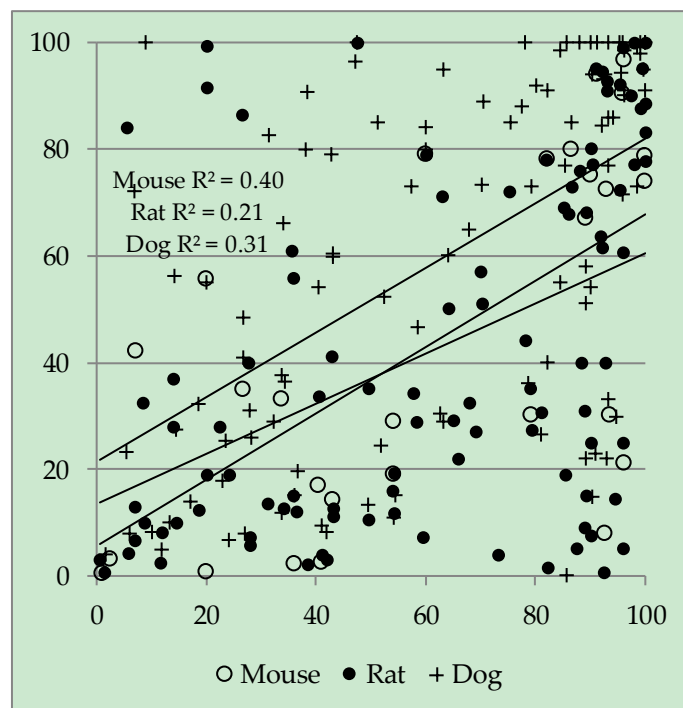

**Figure 1.** Observed oral bioavailability in humans (x-axis) vs. mouse, rat and dog (y-axis).

**Table 1.** Predicted and observed oral bioavailability in man for the 156 compounds in the main applicability domain of the model.

| Compound         | Predicted F (%) | Observed F (%) [5,21] |
|------------------|-----------------|-----------------------|
| Acarbose         | 1.0             | 1.4                   |
| Acebutolol       | 17.2            | 35.5                  |
| Acyclovir        | 24.8            | 38.4                  |
| Adefovir         | 11.4            | 12.0                  |
| Alprazolam       | 72.9            | 90.0                  |
| Amitriptyline    | 37.9            | 47.0                  |
| Amoxicillin      | 58.6            | 85.2                  |
| Antipyrine       | 89.9            | 98.5                  |
| Azathioprine     | 56.4            | 55.0                  |
| Cefixime         | 18.5            | 52.3                  |
| Chlorpheniramine | 41.3            | 40.8                  |
| Clonazepam       | 79.6            | 93.0                  |
| Dapsone          | 91.9            | 93.0                  |
| Diazepam         | 94.0            | 93.0                  |

|                           |      |       |
|---------------------------|------|-------|
| Doxazosin                 | 47.8 | 64.0  |
| Estradiol Valerate        | 16.2 | 5.9   |
| Ethambutol                | 51.9 | 87.4  |
| Ethimizol                 | 38.4 | 8.4   |
| Ethinylestradiol          | 10.4 | 41.9  |
| Ethosuximide              | 86.8 | 100.0 |
| Ethylmorphine             | 45.8 | 28.0  |
| Etoposide                 | 17.0 | 49.5  |
| Fenfluramine              | 67.3 | 89.3  |
| Fenoterol                 | 9.0  | 1.5   |
| Fexofenadine              | 34.5 | 41.0  |
| Finasteride               | 76.2 | 80.0  |
| Fleroxacin                | 72.4 | 99.9  |
| Fluconazole               | 51.7 | 90.0  |
| Flumazenil                | 27.9 | 22.3  |
| Flunisolide               | 67.0 | 20.0  |
| Flunitrazepam             | 70.3 | 85.0  |
| Fluvastatin               | 26.9 | 26.5  |
| Foscarnet                 | 10.5 | 13.1  |
| Fosfomycin                | 3.8  | 32.2  |
| Furosemide                | 47.7 | 58.3  |
| Gabapentin                | 57.5 | 60.0  |
| Ganciclovir               | 12.9 | 8.8   |
| Gatifloxacin              | 74.9 | 96.0  |
| Glaziovine                | 23.2 | 84.3  |
| Glyburide (Glibenclamide) | 71.7 | 90.2  |
| Griseofulvin              | 56.8 | 73.1  |
| Guanfacine                | 29.5 | 81.1  |
| Hydralazine               | 55.8 | 33.6  |
| Hydrochlorothiazide       | 31.0 | 63.1  |
| Ibuprofen                 | 99.0 | 97.5  |
| Idazoxan                  | 52.0 | 34.0  |
| Ifosphamide               | 56.0 | 90.2  |
| Indapamide                | 57.7 | 99.0  |
| Indomethacin              | 95.9 | 91.9  |
| Isosorbide dinitrate      | 18.3 | 27.6  |
| Isosorbide-2-mononitrate  | 42.9 | 100.0 |
| Isosorbide-5-mononitrate  | 42.9 | 95.7  |
| Isoxicam                  | 83.2 | 98.5  |
| Ketanserin                | 53.3 | 47.4  |
| Ketorolac                 | 79.4 | 95.9  |
| Lansoprazole              | 47.3 | 81.0  |
| Levodopa                  | 80.0 | 34.2  |
| Levofloxacin              | 80.1 | 99.0  |
| Levonorgestrel            | 61.9 | 89.0  |
| Lidocaine                 | 45.8 | 27.8  |
| Linezolid                 | 73.5 | 99.5  |
| Lisuride                  | 44.8 | 14.0  |
| Losartan                  | 49.9 | 35.8  |
| Melagatran                | 5.4  | 6.9   |
| Meloxicam                 | 48.9 | 91.0  |
| Menogaril                 | 7.5  | 33.6  |
| Mepindolol                | 69.6 | 82.1  |

|                                        |      |       |
|----------------------------------------|------|-------|
| Mercaptopurine                         | 51.6 | 14.0  |
| Metformin                              | 25.6 | 57.8  |
| Methadone                              | 77.6 | 85.5  |
| Methylprednisolone                     | 55.2 | 49.4  |
| Metoclopramide                         | 63.3 | 75.3  |
| Metolazone                             | 37.6 | 38.0  |
| Metoprolol                             | 46.5 | 41.3  |
| Midazolam                              | 50.3 | 35.9  |
| Morphine                               | 16.3 | 36.5  |
| Moxifloxacin                           | 64.4 | 82.0  |
| Moxonidine                             | 46.4 | 87.6  |
| Nalbuphine                             | 19.2 | 11.7  |
| Naloxone                               | 13.1 | 0.9   |
| Naltrexone                             | 24.6 | 20.0  |
| Naproxen                               | 75.9 | 85.5  |
| Naratriptan                            | 43.9 | 63.0  |
| Nefazodone                             | 32.4 | 17.0  |
| Nevirapine                             | 74.6 | 93.0  |
| Nizatidine                             | 52.5 | 95.4  |
| Nomifensine                            | 72.5 | 26.5  |
| Norfenfluramine                        | 55.5 | 85.3  |
| Ofloxacin                              | 80.1 | 100.0 |
| Omeprazole                             | 31.7 | 54.3  |
| Ondansetron                            | 60.4 | 59.5  |
| Oseltamivir acid                       | 73.9 | 79.0  |
| Oxazepam                               | 94.3 | 92.8  |
| Phenobarbital                          | 96.1 | 96.0  |
| Phenoxymethylpenicillin (Penicillin V) | 59.6 | 54.1  |
| Phenytoin                              | 66.6 | 78.5  |
| Pindolol                               | 50.4 | 86.5  |
| Piroxicam                              | 85.8 | 100.0 |
| Pravastatin                            | 9.6  | 18.6  |
| Prazosin                               | 55.5 | 62.5  |
| Prednisolone                           | 50.3 | 84.5  |
| Prednisone                             | 44.6 | 88.7  |
| Primaquine                             | 86.9 | 96.0  |
| Procainamide                           | 58.2 | 75.5  |
| Propoxyphene                           | 56.3 | 23.5  |
| Propranolol (-)                        | 15.4 | 27.0  |
| Propranolol (+)                        | 15.4 | 22.7  |
| Propranolol (±)                        | 15.4 | 24.0  |
| Propylthiouracil                       | 70.4 | 77.5  |
| Quinidine                              | 79.9 | 70.0  |
| Rabeprazole                            | 24.6 | 51.8  |
| Ranitidine                             | 39.4 | 57.2  |
| Reboxetine                             | 54.0 | 96.0  |
| Recainam                               | 31.7 | 70.3  |
| Remoxipride                            | 92.0 | 92.5  |
| Risedronate                            | 0.02 | 0.6   |
| Risperidone                            | 26.7 | 65.9  |
| Rosiglitazone                          | 68.9 | 98.0  |
| Rosuvastatin                           | 19.0 | 20.1  |
| Salbutamol                             | 45.3 | 51.2  |

|               |      |      |
|---------------|------|------|
| Salicylate    | 71.3 | 95.2 |
| Saquinavir    | 7.3  | 7.0  |
| Selegiline    | 75.0 | 10.0 |
| Sildenafil    | 54.1 | 40.4 |
| Sitafloxacin  | 73.6 | 89.0 |
| Sitagliptin   | 62.7 | 88.0 |
| Sotalol       | 33.8 | 60.0 |
| Sparfloxacin  | 62.1 | 92.0 |
| Sulfisoxazole | 67.9 | 98.0 |
| Sulpiride     | 30.6 | 31.3 |
| Sumatriptan   | 20.1 | 14.0 |
| Talinolol     | 67.6 | 65.0 |
| Tamsulosin    | 92.0 | 94.6 |
| Terazosin     | 58.8 | 86.0 |
| Terodiline    | 50.9 | 90.8 |
| Tetrabenazine | 61.5 | 5.5  |
| Theophylline  | 56.4 | 90.3 |
| Tiagabine     | 64.0 | 90.0 |
| Timolol       | 42.8 | 63.0 |
| Tinidazole    | 30.3 | 99.0 |
| Tolterodine   | 13.7 | 34.5 |
| Torsemide     | 82.8 | 94.6 |
| Tramadol      | 68.3 | 67.9 |
| Trazodone     | 47.4 | 79.3 |
| Triazolam     | 68.4 | 54.0 |
| Trovafloxacin | 86.4 | 89.1 |
| Valproic Acid | 62.5 | 92.2 |
| Vardenafil    | 20.7 | 14.5 |
| Warfarin      | 96.3 | 94.0 |
| Venlafaxine   | 54.9 | 43.0 |
| Xamoterol     | 12.3 | 5.3  |
| Zalcitabine   | 27.3 | 93.4 |
| Zanamivir     | 6.9  | 2.5  |
| Zolmitriptan  | 53.2 | 42.8 |
| Zolpidem      | 67.1 | 69.1 |
| Zopiclone     | 57.5 | 78.0 |

**Table 2.** Compounds excluded beforehand for prediction of oral bioavailability (F) and their predicted and observed fraction absorbed ( $f_{abs}$ ).

| Compound                  | Predicted $f_{abs}$ (%) | Observed $f_{abs}$ (%) | Reason for exclusion beforehand               |
|---------------------------|-------------------------|------------------------|-----------------------------------------------|
| 5-Fluorouracil            | 79                      | High permeability      | Hydrolysed                                    |
| Acetylsalicylate          | 90                      | 82                     | Prodrug                                       |
| Amlodipine                | 100                     | 95                     | Calcium-blocker; blood-flow modulating        |
| Amosulalol                | 90                      | 100                    | Uncertain/questionable human F-estimate       |
| Azithromycin              | 13                      | 37                     | MW >700 Da                                    |
| Cefuroxime axetil         | 19                      | 34                     | Prodrug                                       |
| Cyclosporine              | 4                       | 40                     | MW >700 Da                                    |
| Erythromycin              | 15                      | >33                    | MW >700 Da                                    |
| Estramustine phosphate    | 44                      | 82                     | Prodrug                                       |
| Felodipine                | 100                     | 91                     | Calcium-blocker; blood-flow modulating        |
| Gitoxin                   | 17                      | ?                      | MW >700 Da                                    |
| Itraconazole              | 48                      | 82                     | MW >700 Da                                    |
| Lithium carbonate         | -                       | 94                     | Metal (not possible to predict)               |
| Nicardipine               | 95                      | 95                     | Calcium-blocker; blood-flow modulating        |
| Nifedipine                | 100                     | 95                     | Calcium-blocker; blood-flow modulating        |
| Nimodipine                | 95                      | 90                     | Calcium-blocker; blood-flow modulating        |
| Nisoldipine               | 100                     | 90                     | Calcium-blocker; blood-flow modulating        |
| Nitrendipine              | 100                     | 88                     | Calcium-blocker; blood-flow modulating        |
| Nufenoxole SC-27166       | -                       | 100                    | SMILES did not work (not possible to predict) |
| Physostigmin              | 87                      | ?                      | Hydrolysed                                    |
| Pyridostigmin             | -                       | ?                      | Quaternary amine (not possible to predict)    |
| Rifabutin                 | 31                      | 53                     | MW >700 Da                                    |
| Rifampin                  | 90                      | 95                     | MW >700 Da                                    |
| Tacrolimus                | 33                      | 15                     | MW >700 Da                                    |
| TRH tartrate (Protirelin) | 12                      | ?                      | Hydrolysed?                                   |
| Verapamil (-)             | 95                      | 100                    | Calcium-blocker; blood-flow modulating        |
| Verapamil (+)             | 95                      | 100                    | Calcium-blocker; blood-flow modulating        |
| Verapamil ( $\pm$ )       | 95                      | 100                    | Calcium-blocker; blood-flow modulating        |
